# Supplementary material for: SYK kinase mediates brown fat differentiation and activation
Source: PubMed Central journal article supplement (PMC5727434; doi:10.1038/s41467-017-02162-3), 2017-12-13
Supplement: 41467_2017_2162_MOESM1_ESM.pdf [file 41467_2017_2162_MOESM1_ESM.pdf]

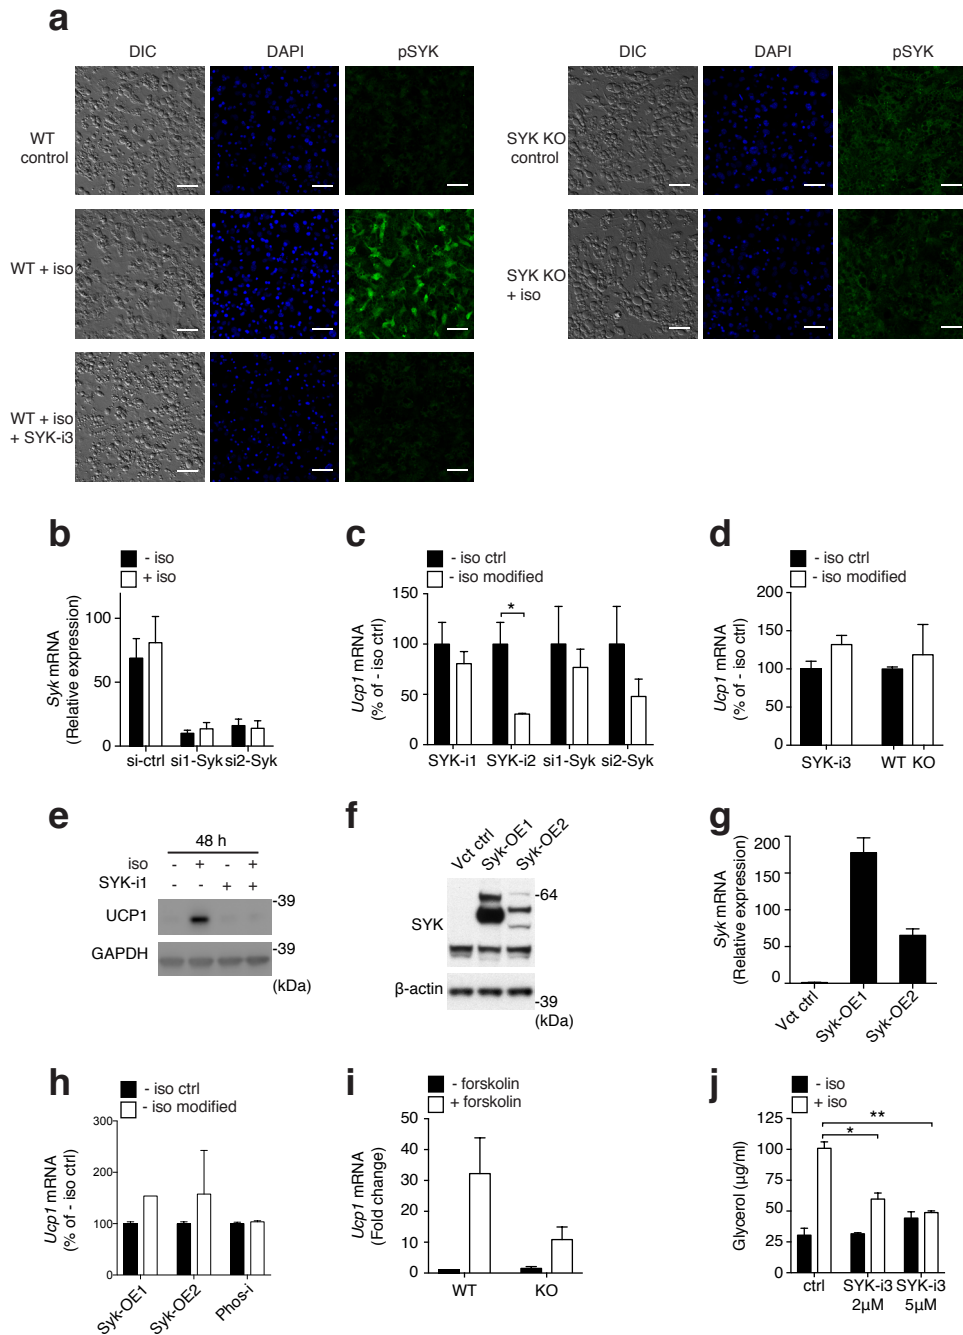

**Supplementary Figure 1. SYK regulating *Ucp1* expression in response to  $\beta$ -adrenergic stimulation.**

**(a)** Immunofluorescence of primary brown adipocytes stimulated with isoproterenol in the absence or presence of  $5\mu\text{M}$  SYK-i3 (R406) and in primary day 8 brown adipocytes derived from CreERT2 Syk<sup>flox/flox</sup> mice (KO) treated with 4-hydroxy tamoxifen (4-OHT) for 9 days or WT controls, one representative IF of three independent replicates is shown. Scale bar =  $50\mu\text{M}$ . **(b)** *Syk* RNA expression confirming knock down on day 10 of differentiation of immortalized brown pre-adipocytes following siRNA

mediated knock-down of *Syk* 4 days prior stimulated at day 10 of differentiation with isoproterenol for 6 h. **(c)**, *Ucp1* RNA expression in the absence of isoproterenol for 6h of differentiated day 8 immortalized brown adipocytes pretreated with SYK-i1, SYK-i2 or following transfection with siRNA targeting *Syk* mRNA 4 days prior (si1-Syk and si2-Syk). **(d)** *Ucp1* RNA expression without isoproterenol in primary wild-type C57Bl/6 day 8 brown adipocytes *in vitro* pretreated with SYK-i3 or in primary day 8 brown adipocytes derived from CreERT2 *Syk*<sup>flox/flox</sup> mice (KO) or *Syk*<sup>flox/flox</sup> (WT) and both treated with 4-hydroxy tamoxifen (4-OHT) for 9 days. Mean % of iso stimulated control  $\pm$  SEM of three independent experiments shown in **(c-d)**. **(e)** UCP1 protein expression in immortalized day8 differentiated brown adipocytes pretreated with 10 $\mu$ M Syk-i1 at day 8 of differentiation and then stimulated or not with isoproterenol for 48 h. **(f-g)** SYK protein **(f)** and *Syk* mRNA expression **(g)** following overexpression of wild-type mouse SYK in brown adipocytes (Syk-OE1 and Syk-OE2). **(h)**, *Ucp1* RNA expression in primary day8 brown adipocytes after overexpression of wild-type mouse SYK (Syk-OE1 and Syk-OE2) or pretreatment with 1 $\mu$ M phosphatase inhibitor 3AC. Mean % of -iso control  $\pm$  SEM of two independent experiments shown. **(i)**, Forskolin (1 $\mu$ M) induction of *Ucp1* expression in primary brown adipocytes derived from KO or WT and both treated with 4-hydroxy tamoxifen (4-OHT) for 9 days. Fold change of forskolin stimulated control  $\pm$  SEM of three independent experiments. **(j)**, Cell culture medium glycerol content from primary white adipocytes at day8 treated with 1 $\mu$ M for 24h in the absence or presence of 2 or 5 $\mu$ M SYK-i3. For **(b-d, h, i)** two tailed unpaired Student's t-test was performed (\*P < 0.05, \*\*P < 0.005 and \*\*\*P < 0.0005). For **(j)** one way ANOVA on iso stimulated cells.

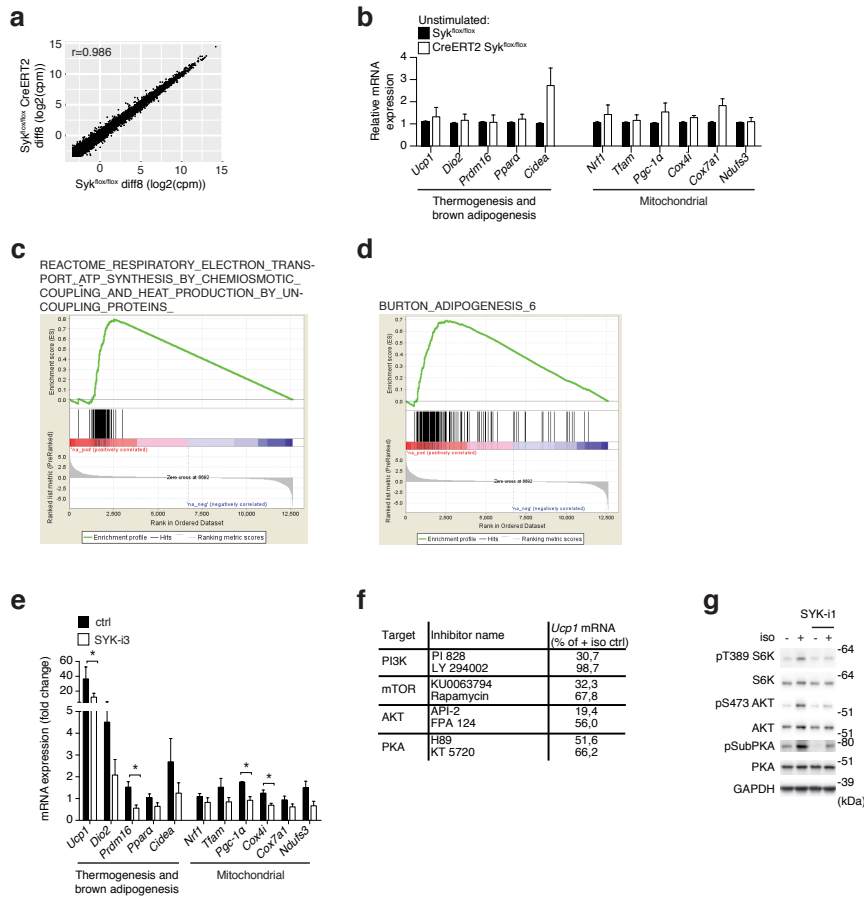

**Supplementary Figure 2. SYK mediates expression of numerous brown fat characteristic genes in  $\beta$ -adrenergic activated brown adipocytes and signals the AKT/mTOR pathway to up-regulate *Ucp1*.**

(a) RNAseq analysis of unstimulated day8 differentiated brown fat cells derived from CreERT2 Syk<sup>flox/flox</sup> (KO) mice and Syk<sup>flox/flox</sup> controls (WT) following continuous treatment with tamoxifen for 9 days. Values plotted are log2 counts per million reads (cpm) as estimated by edgeR from three independent replicates. (b) qPCR validation of the same cells as in (a) from three independent replicates. (c-d) Enrichment plots of the genes listed in the indicated gene set enrichment analyses (GSEA) for genes identified in the comparison of the fold change of stimulated and unstimulated WT controls versus stimulated and unstimulated KO brown adipocytes with a partial loss of SYK protein on day 8 of differentiation of three independent replicates. (e) Fold change of mRNA expression determined by qPCR in primary day8 differentiated brown adipocytes stimulated with isoproterenol for 6h and pre-treated or not with 2 $\mu$ M SYK-i3. Results shown were pooled from three independent experiments and shown as mean  $\pm$ SEM. Asterisks denote statistical significance for individual genes (unpaired t-tests). (f) Table showing effect of PI3K, mTOR, AKT and PKA inhibitors on *Ucp1* expression from the screen as shown in Figure 1a from three independent replicates. Shown are mean % of isoproterenol stimulated control. (g) Immunoblotting of day8 immortalized brown adipocytes pretreated with 10 $\mu$ M SYK-i1 and stimulated or not with isoproterenol for 1h.

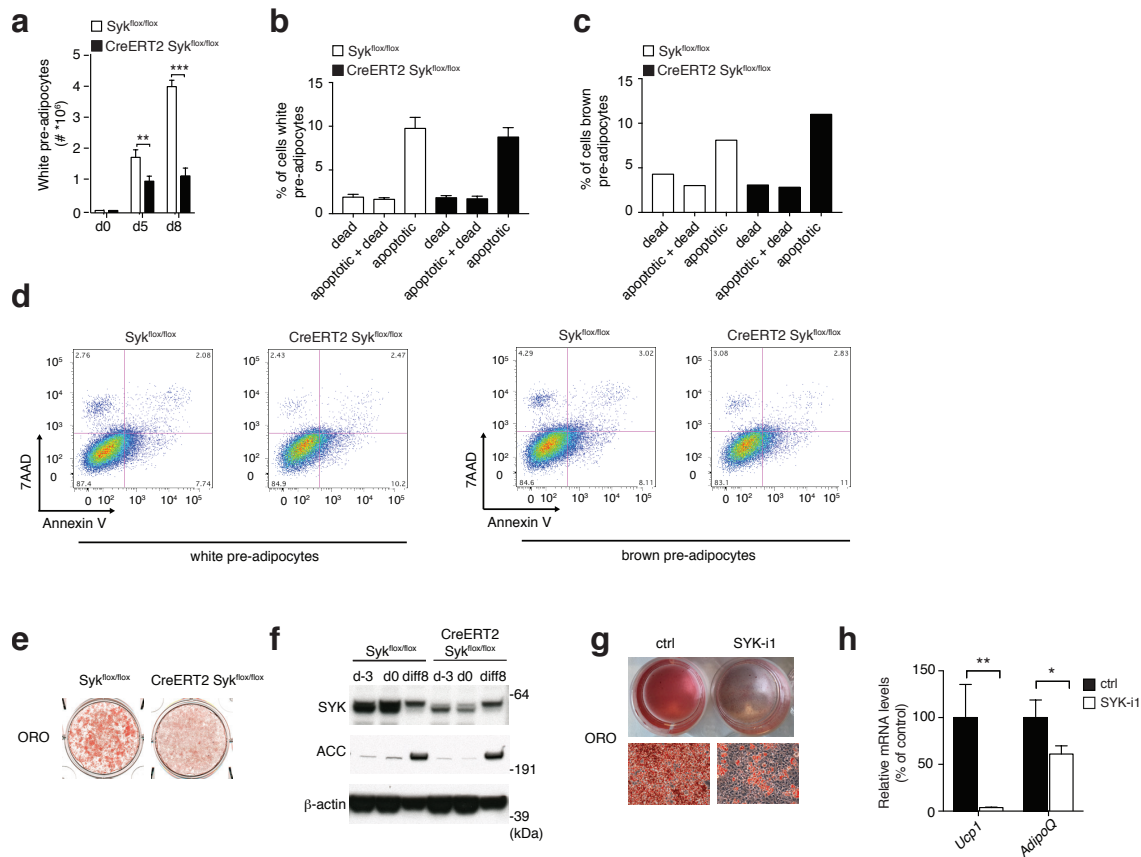

### Supplementary Figure 3. SYK is essential for pre-adipocyte proliferation and for adipocyte differentiation.

**(a)** Cell numbers of white pre-adipocytes after seeding the CreERT2 Syk<sup>flox/flox</sup> (KO) and Syk<sup>flox/flox</sup> (WT) control pre-adipocytes at equal cell numbers (d0) following continuous 4-hydroxy tamoxifen (4-OHT) treatment beginning 3 days prior. Asterisks denote statistical significance ( $p < 0.05$ ) across 3 independent experiments (two-tailed T-test). **(b-c)** Quantification of flow cytometry analysis of dead (7-AAD<sup>+</sup>), apoptotic and dead (7-AAD<sup>+</sup>, Annexin V<sup>+</sup>) or apoptotic cells (Annexin V<sup>+</sup>) of white **(b)** and brown pre-adipocytes derived from KO and WT mice **(c)**. **(d)** Representative flow cytometry plots used for quantification in **(b-c)** for white (left panel) and brown pre-adipocytes (right panel). **(e)** Representative Oil red oil staining (ORO) of brown pre-adipocytes isolated from KO and WT mice following 4-hydroxy tamoxifen (4-OHT) induced Cre mediated loss of SYK protein **(f)** in pre-adipocytes (d-3, d0) that were grown to confluence and induced to differentiate for another 8 days (diff8). Representative immunoblots of three independent replicates. **(g-h)** Oil red oil staining (ORO) **(g)** and mRNA expression **(h)** 10 days post induction of differentiation of immortalized brown pre-adipocytes in the presence of 2 $\mu$ M SYK-i1. For **(a, h)** two tailed unpaired Student's t-test was performed (\* $P < 0.05$ , \*\* $P < 0.005$  and \*\*\* $P < 0.0005$ ).



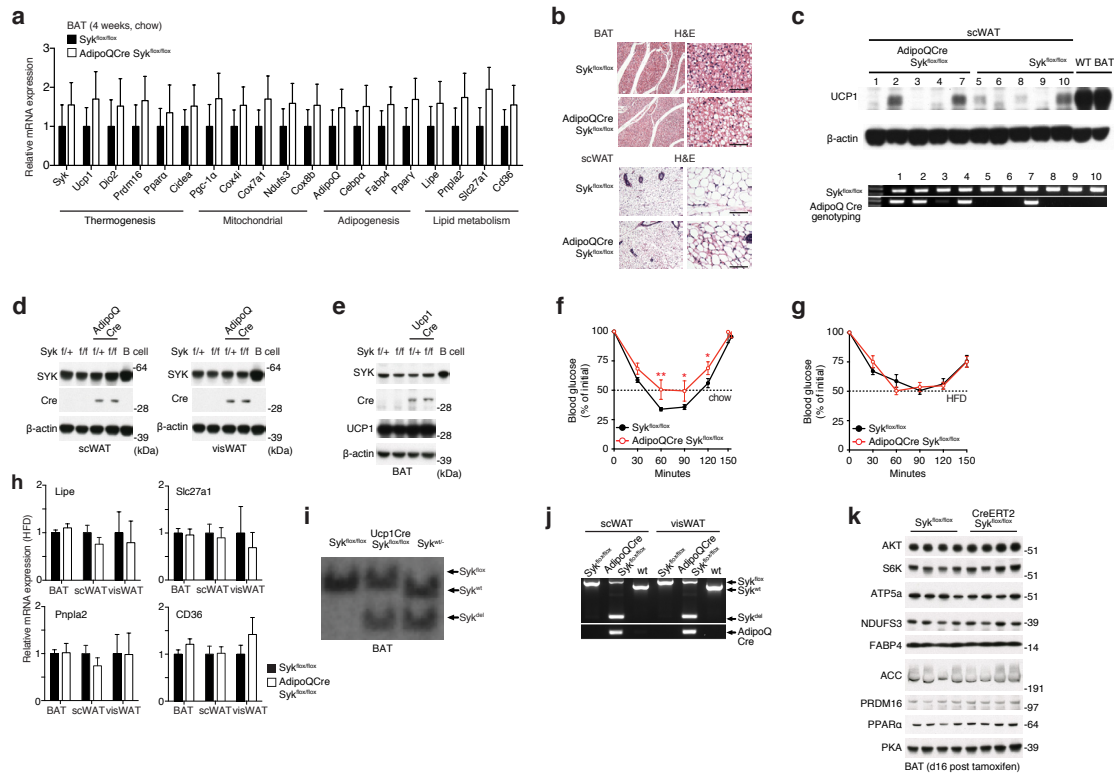

**Supplementary Figure 4. *Syk* deficiency is incompatible with brown fat formation and activation.** RNA expression of BAT depots (a) and histology of BAT and scWAT depots (b) from 4 week old AdipoQCre *Syk*<sup>flox/flox</sup> compared to *Syk*<sup>flox/flox</sup> littermate controls (n=5 each genotype) on a chow diet housed at 20°C. Scalebar (b) 100µm. (c) Immunoblotting of UCP1 and β-actin in scWAT of 8 week old AdipoQCre *Syk*<sup>flox/flox</sup> mice (n=5) or *Syk*<sup>flox/flox</sup> mice (n=5) littermates and wild-type BAT housed at 20°C. Samples were loaded according to genotyping (lower panel) for expression of AdipoQ Cre. (d-e) Representative immunoblots SYK and Cre from three independent isolations of scWAT and visWAT from 8 week old AdipoQCre *Syk*<sup>flox/flox</sup> mice, *Syk*<sup>flox/flox</sup> controls and heterozygous littermates (d) or of BAT from *Ucp1Cre Syk*<sup>flox/flox</sup> mice, *Syk*<sup>flox/flox</sup> controls and heterozygous littermates (e). (f-g) Insulin tolerance test (ITT) of male AdipoQCre *Syk*<sup>flox/flox</sup> or *Syk*<sup>flox/flox</sup> control mice on a normal chow diet (chow) (f) or high fat diet (HFD) (g) for 11 weeks using the same mice as shown in Figure 4e-f. RNA expression measured by qPCR of BAT, scWAT and visWAT from mice on a HFD for 25 weeks (n=6) (h). Representative southern blot of BamHI digested genomic DNA of BAT from 6 week old mice with the indicated genotypes from two independent isolations (i) and PCR amplification of the deleted *Syk*<sup>flox</sup> allele (top) and the AdipoQCre allele (bottom) in scWAT and visWAT of AdipoQCre *Syk*<sup>flox/flox</sup>, *Syk*<sup>flox/flox</sup> mice, and wild-type mice with the indicated genotypes (j) of three independent isolations. (k) Representative immunoblots of two independent experiments of BAT from 10 week old CreERT2 *Syk*<sup>flox/flox</sup> (KO) mice and *Syk*<sup>flox/flox</sup> (WT) controls (n=4) 16 days after starting daily i.p. tamoxifen treatment for 5 consecutive days.

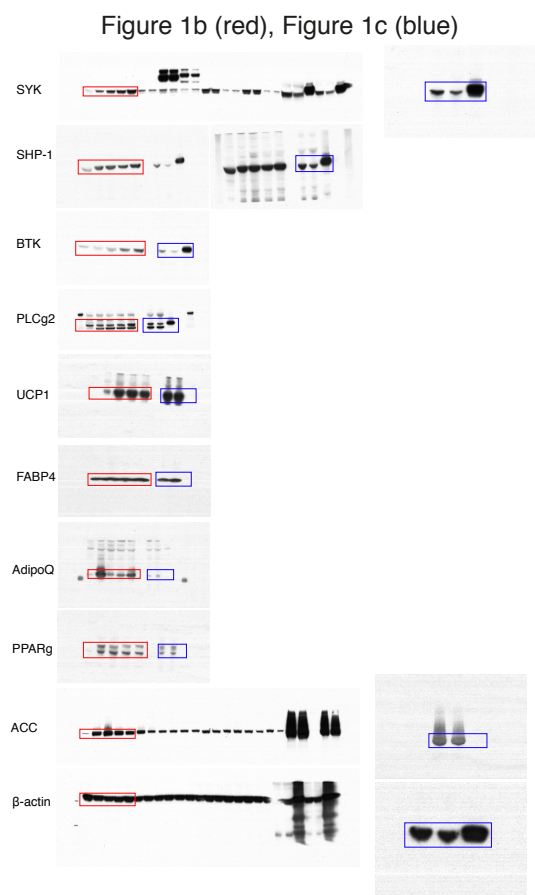

Supplementary figure 1e (green)

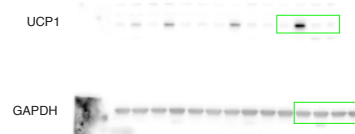

Supplementary figure 1f (orange)

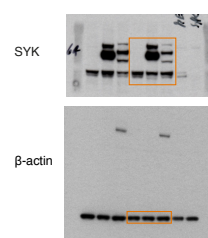

**Supplementary Figure 5 related to Figure 1. Uncropped western blots related to Figure 1b (red boxes) and 1c (blue boxes). Uncropped western blots related to Supplementary Figure 1e (green boxes) and 1f (orange boxes).**

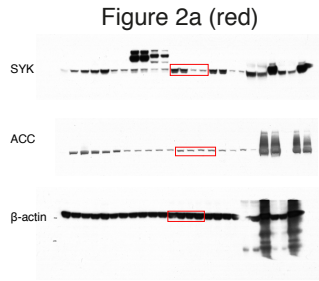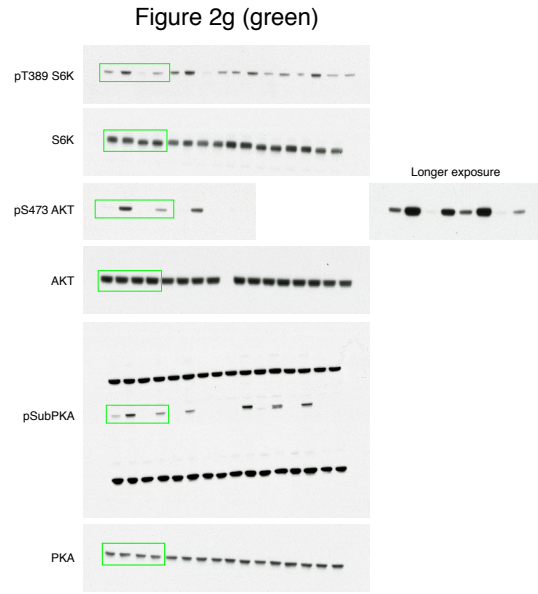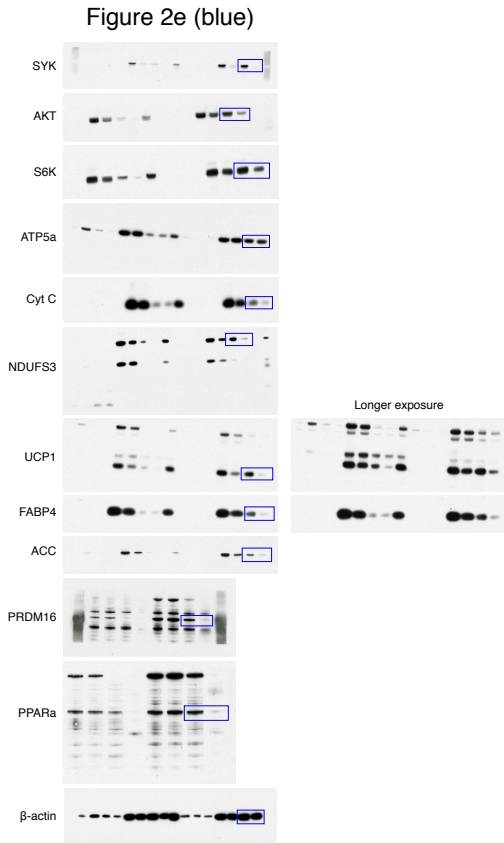

Supplementary figure 2g (orange)

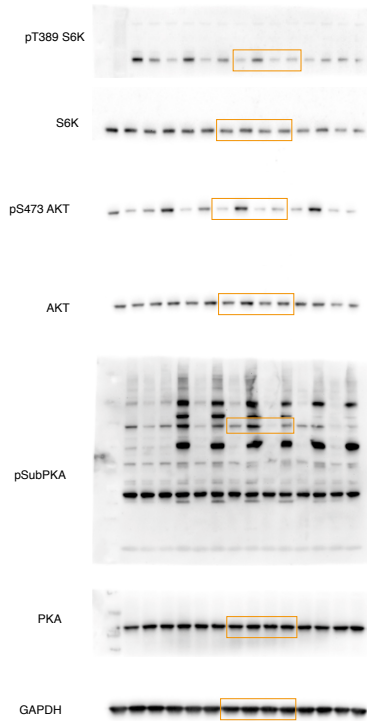

**Supplementary Figure 6 related to Figure 2. Uncropped western blots related to Figure 2a (red boxes), 2e (blue boxes), 2g (green boxes) and Supplementary Figure 2g (orange boxes).**

Figure 3a (red)

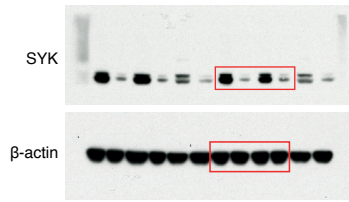

Supplementary figure 3f (blue)

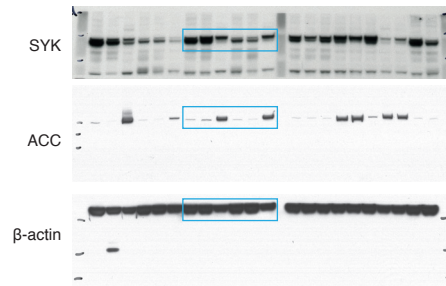

**Supplementary Figure 7 related to Figure 3. Uncropped western blots related to Figure 3a (red boxes) and Supplementary 4f (blue boxes) and 4k (highlighted in green).**

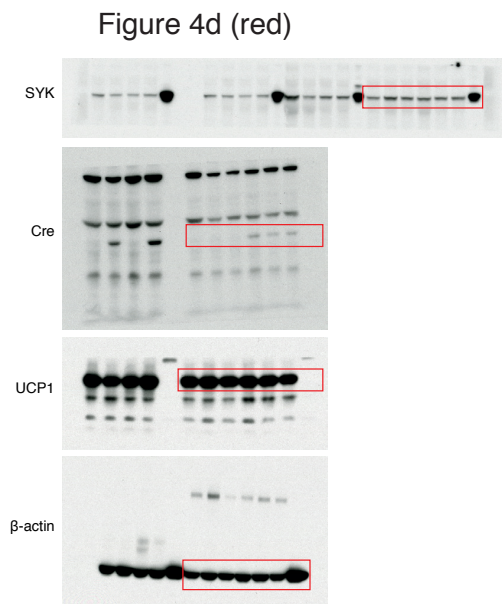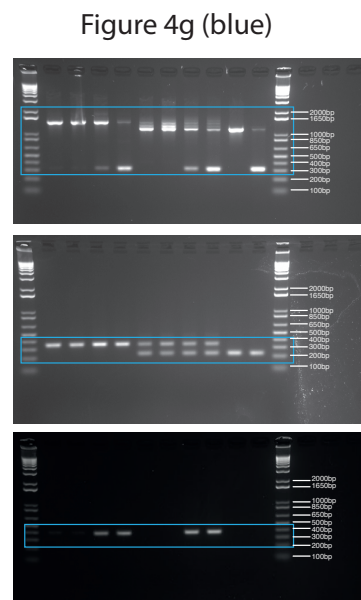

Figure 4h (green), Supplementary figure 4h (orange)

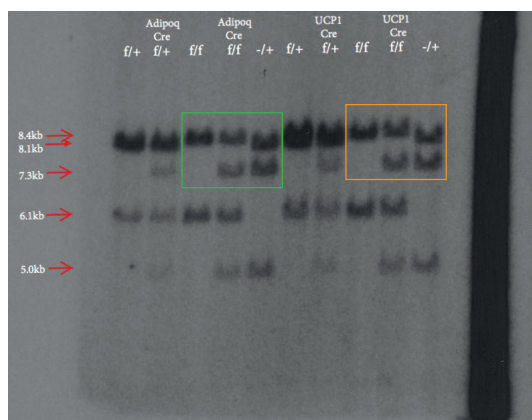

Figure 4k (pink)

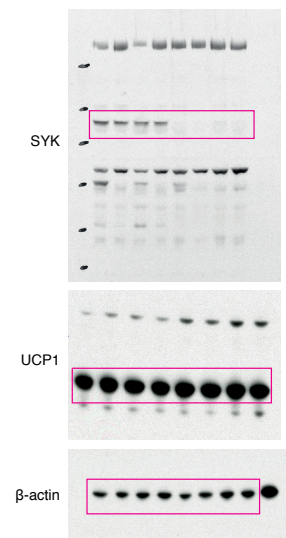

**Supplementary Figure 8 related to Figure 4. Uncropped western blots related to Figure 4d (red boxes) and 4k (pink boxes). Uncropped agarose gels from PCR products related to Figure 4g (blue boxes) and uncropped blots from southern blots related to Figure 4h (orange boxes).**

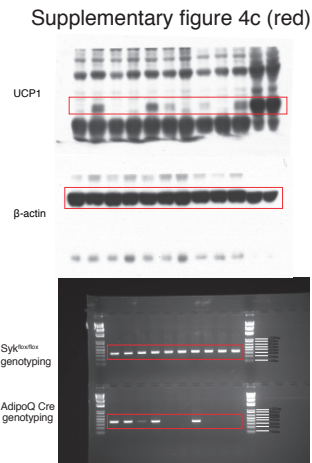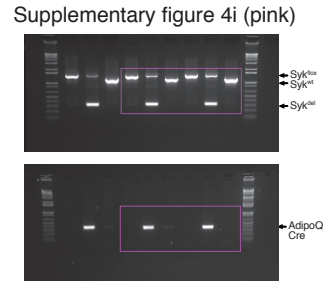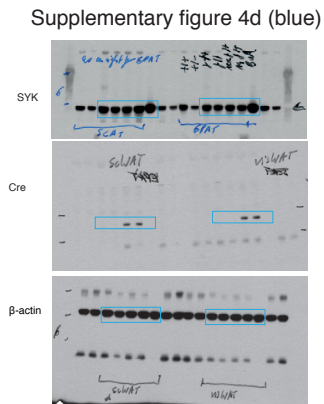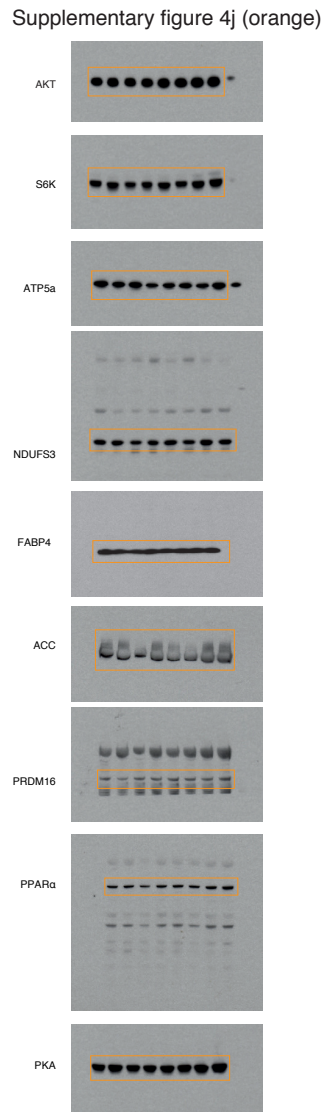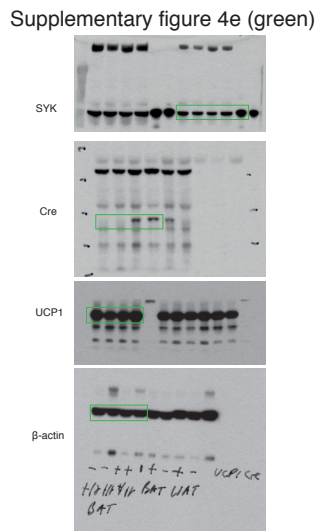

**Supplementary Figure 9 related to Supplementary Figure 4. Uncropped western blots related to Supplementary Figure 4c (red boxes), 4d (blue boxes), 4e (green boxes) and 4j (orange boxes). Uncropped agarose gels from PCR products related to Supplementary Figure 4c (blue boxes) and 4i (pink boxes).**

**Supplementary Table 1. Library of kinase inhibitors used in the study**

A complete list of kinase inhibitors including catalog number, product name and target kinase.

| <b>Cat. No.</b> | <b>Product name</b>     | <b>Target kinase</b> |
|-----------------|-------------------------|----------------------|
| 414             | AG 490                  | EGFR                 |
| 431             | ML 9 hydrochloride      | MLCK                 |
| 3439            | NH 125                  | CaM Kinase III       |
| 541             | Fasudil hydrochloride   | ROCK                 |
| 741             | GF 109203X              | PKC                  |
| 1110            | Genistein               | EGFR                 |
| 1130            | LY 294002 hydrochloride | PI3K                 |
| 1144            | U0126                   | MEK                  |
| 1213            | PD 98059                | MEK                  |
| 1254            | Y-27632 dihydrochloride | ROCK                 |
| 1264            | SB 202190               | p38 MAPK             |
| 1284            | Olomoucine              | cdk                  |
| 1300            | LFM-A13                 | BTK                  |
| 1321            | ZM 336372               | Raf                  |
| 1366            | ZM 449829               | JAK3                 |
| 1367            | ZM 39923 hydrochloride  | JAK3                 |
| 1381            | GW 5074                 | Raf                  |
| 1397            | PP 1                    | Src                  |
| 1402            | SB 203580 hydrochloride | p38 MAPK             |
| 1405            | (-)-Terreic acid        | BTK                  |
| 1407            | PP 2                    | Src                  |
| 1459            | SU 4312                 | VEGFR                |
| 1496            | SP 600125               | JNK                  |
| 1580            | Purvalanol A            | cdk                  |
| 1581            | Purvalanol B            | cdk                  |
| 3544            | KU 55933                | ATM                  |
| 1614            | SB 431542               | TGFbR1               |
| 1616            | SB 216763               | GSK-3                |
| 1617            | SB 415286               | GSK-3                |

| <b>Cat. No.</b> | <b>Product name</b>              | <b>Target kinase</b>     |
|-----------------|----------------------------------|--------------------------|
| 1777            | Arctigenin                       | MEK                      |
| 1937            | NSC 693868                       | cdk                      |
| 1962            | SB 239063                        | p38 MAPK                 |
| 1969            | SL 327                           | MEK                      |
| 2002            | Ro 31-8220 mesylate              | Broad Spectrum Inhibitor |
| 2072            | Aminopurvalanol A                | cdk                      |
| 2151            | API-2                            | PKB                      |
| 2238            | GW 441756                        | TrkA                     |
| 2239            | GW 583340 dihydrochloride        | EGFR                     |
| 2272            | Ro 08-2750                       | TrkA                     |
| 2275            | TBB                              | CK2                      |
| 2291            | 1,2,3,4,5,6-Hexabromocyclohexane | JAK2                     |
| 2415            | HA 1100 hydrochloride            | ROCK                     |
| 2416            | BIBX 1382 dihydrochloride        | EGFR                     |
| 2442            | CGP 53353                        | PKC                      |
| 2457            | Arcyriaflavin A                  | cdk                      |
| 2458            | ZM 447439                        | Aurora                   |
| 2471            | ER 27319 maleate                 | Syk                      |
| 2475            | ZM 323881 hydrochloride          | VEGFR                    |
| 2499            | ZM 306416 hydrochloride          | VEGFR                    |
| 2539            | IKK 16                           | IKK                      |
| 2542            | Ki 8751                          | VEGFR                    |
| 2558            | 10-DEBC hydrochloride            | PKB                      |
| 2559            | TPCA-1                           | IKK                      |
| 2560            | SB 218078                        | Chk1                     |
| 2591            | TCS 359                          | FLT3                     |
| 2605            | PD 198306                        | MEK                      |
| 2609            | Ryuvidine                        | cdk                      |
| 2611            | IMD 0354                         | IKK                      |
| 2639            | CGK 733                          | ATR/ATM                  |
| 2693            | PHA 665752                       | cMET                     |
| 2694            | PD 407824                        | Chk1                     |
| 2718            | LY 364947                        | TGFbR1                   |



| <b>Cat. No.</b>        | <b>Product name</b>          | <b>Target kinase</b>     |
|------------------------|------------------------------|--------------------------|
| 2731                   | CGP 57380                    | Mnk1                     |
| 2768                   | PQ 401                       | IGF-1R                   |
| 2814                   | PI 828                       | PI3K                     |
| 2828                   | NU 7026                      | DNA-PK                   |
| 2902                   | D 4476                       | CK1                      |
| 2908                   | EO 1428                      | p38 MAPK                 |
| 2910                   | H 89 dihydrochloride         | PKA                      |
| 2926                   | FPA 124                      | PKB                      |
| 2977                   | GW 843682X                   | PLK                      |
| 3000                   | Iressa                       | EGFR                     |
| 3037                   | SU 5416                      | VEGFR                    |
| 3063                   | 1-Naphthyl PP1               | Src                      |
| 3572                   | GSK 650394                   | SGK                      |
| 3194                   | BIO                          | GSK-3                    |
| 3269                   | SD 208                       | TGFbR1                   |
| 3271                   | Compound 401                 | DNA-PK                   |
| 3314                   | BI 78D3                      | JNK                      |
| 3318                   | SC 514                       | IKK                      |
| 1289                   | KT 5823                      | PKG                      |
| 1435                   | SQ 22536                     | Adenylyl cyclase         |
| 3093                   | Dorsomorphin dihydrochloride | AMPK                     |
| 1292                   | Rapamycin                    | mTOR                     |
| 1277                   | KN-62                        | CaMKII                   |
| 1288                   | KT 5720                      | PKA                      |
| 3824                   | KH7                          | Adenylyl cyclase         |
| Merck millipore 570250 | STO-609 acetate              | CaMKK/AMPK               |
| 3725                   | KU0063794                    | mTOR                     |
| LC laboratories K-2152 | K252a                        | Broad Spectrum Inhibitor |

**Supplementary Table 2. Genotyping primer and amplification product size**

| <b>Amplified PCR product</b>                                                                      | <b>Forward Primer 5' - 3'</b> | <b>Reverse Primer 5' - 3'</b> |
|---------------------------------------------------------------------------------------------------|-------------------------------|-------------------------------|
| <i>Syk</i> deleted allele: 320 bp; <i>Syk</i> flox allele: 1428 bp; <i>Syk</i> wt allele: 1186 bp | GCCCGTTCTGTGCCTACT<br>GG      | GCTGGTTCCTTTTCCTT<br>CC       |
| <i>Syk</i> flox allele: 349 bp; <i>Syk</i> wt allele: 234 bp                                      | GCCCGTTCTGTGCCTACT<br>GG      | TAGCTAACCAAACCCAC<br>GGC      |
| AdipoQCre: around 373 bp                                                                          | CATGATGCAGGTCCTGAT<br>TG      | ATGTTTAGCTGGCCCAAA<br>TG      |
| Ucp1Cre: around 654 bp                                                                            | TGTCCGTTTGCCGGTCGT<br>GG      | ATCCCTTCCAGGGCGCG<br>AGT      |
| CreERT2: around 689 bp                                                                            | ATACCGGAGATCATGCA<br>AGC      | TCCAGAGACTTCAGGGT<br>GCT      |

**Supplementary Table 3. Mouse specific primer pairs used for Quantitative Real-time PCR**

| <b>Gene name</b> | <b>Forward Primer 5' - 3'</b> | <b>Reverse Primer 5' - 3'</b> |
|------------------|-------------------------------|-------------------------------|
| <i>I8S</i>       | GTAACCCGTTGAACCCCAT           | CCATCCAATCGGTAGTAGC           |
| <i>I8S</i>       | ACCGCAGCTAGGAATAATGGA         | GCCTCAGTTCCGAAAACCA           |
| <i>Tbp</i>       | ACCCTTCACCAATGACTCCTAT<br>G   | ATGATGACTGCAGCAAATCG<br>C     |
| <i>Cebpa</i>     | TGCGCAAGAGCCGAGATAAA          | CCTTCTGTTGCGTCTCCACG          |
| <i>Pparγ</i>     | GTGCCAGTTTCGATCCGTAGA         | GGCCAGCATCGTGTAGATGA          |
| <i>Cidea</i>     | TGCTCTTCTGTATCGCCAGT          | GCCGTGTTAAGGAATCTGCT<br>G     |
| <i>Dio2</i>      | CAGTGTGGTGCACGTCTCCAA<br>TC   | TGAACCAAAGTTGACCACCA<br>G     |
| <i>Pgc-1α</i>    | CCCTGCCATTGTAAAGACC           | TGCTGCTGTTCTGTTTTT            |
| <i>Ppara</i>     | AGAGCCCCATCTGTCTCTC           | ACTGGTAGTCTGCAAAACCA<br>AA    |
| <i>Prdm16</i>    | CAGCACGGTGAAGCCATTC           | GCGTGCATCCGCTTGTG             |
| <i>Ucp1</i>      | ACTGCCACACCTCCAGTCATT         | CTTTGCCTCACTCAGGATTGG         |
| <i>Ucp1</i>      | GGCATTGAGAGGCAAATCAGC<br>T    | CAATGAACACTGCCACACCT<br>C     |
| <i>Cox8b</i>     | GAACCATGAAGCCAACGACT          | GCGAAGTTCACAGTGGTTCC          |
| <i>Cox4i</i>     | ACCAAGCGAATGCTGGACAT          | GGCGGAGAAGCCCTGAA             |
| <i>Cox7a1</i>    | CAGCGTCATGGTCCAGTCTGT         | AGAAAACCGTGTGGCAGAGA          |
| <i>Tfam</i>      | GCAGCTAACTCCAAGTCAGC          | CCGAATCATCCTTTGCCTCC          |
| <i>Nrf1</i>      | GTTGGATGAGTACACGACGC          | GAATTAACCTCCTGTGGCGC          |
| <i>Ndufs3</i>    | CAGGGATCACACCAATGCAC          | AGTCAATGGGTGTCAGCTCA          |
| <i>Syk</i>       | GGAAGAGAGCAACTTTGTGC          | GTCTGGGCCTTGTAGTAGTT          |
| <i>AdipoQ</i>    | CGATTGTCAGTGGATCTGACG         | CAACAGTAGCATCCTGAGCC<br>CT    |
| <i>Fabp4</i>     | ACAAGCTGGTGGTGAATGTG          | CCTTTGGCTCATGCCCTTT           |
| <i>Lipe</i>      | CCGCTGACTTCCTGCAAGAG          | CTGGGTCTATGGCGAATCGG          |

| <b>Gene name</b> | <b>Forward Primer 5' - 3'</b> | <b>Reverse Primer 5' - 3'</b> |
|------------------|-------------------------------|-------------------------------|
| <i>Pnpla2</i>    | GGTGACCATCTGCCTTCCAG          | TGCAGAAGAGACCCAGCAGT          |
| <i>Slc27a1</i>   | CCGTATCCTCACGCATGTGT          | CTCCATCGTGTCTTCATTGAC         |
| <i>Cd36</i>      | TCTGTTGGAACAGAGGATGA          | TGGAACCAAACCTGAGGAATG         |
| <i>Syk</i>       | GAGTCCTGGATGCTGGTGAT          | ACTTCATCCCCATGGAAACC          |
| <i>Glut4</i>     | CTGTGCTGGTTTCTCCAACCT         | CCCATAGCATCCGCAACATA          |

### Supplementary Table 4. Antibodies

The following antibodies were used in immunoblotting (WB) or Immunofluorescence (IF) experiments.

| Target antigen                  | Clone / Catalog #                   | Manufacturer  | Application   |
|---------------------------------|-------------------------------------|---------------|---------------|
| SYK                             | D3Z1E (rabbit monoclonal)           | CST           | WB (1:1,000)  |
| pSYK                            | sc-293118 (rabbit polyclonal)       | SCBT          | IF-P (1:50)   |
| SHP1                            | Y476 (rabbit monoclonal)            | Abcam         | WB (1:1,000)  |
| PLC $\gamma$ 2                  | Q-20 (sc-407)                       | SCBT          | WB (1:1,000)  |
| BTK                             | D3H5 (rabbit monoclonal)            | CST           | WB (1:1,000)  |
| pS473 AKT                       | D9E (rabbit monoclonal) and #4058   | CST           | WB (1:1,000)  |
| AKT                             | # 9272 (rabbit polyclonal)          | CST           | WB (1:1,000)  |
| pT389 S6K                       | #9234 (Rabbit monoclonal)           | CST           | WB (1:1000)   |
| S6K                             | #2708 (Rabbit monoclonal)           | CST           | WB (1:1000)   |
| GAPDH                           | 8245 (mouse monoclonal)             | Abcam         | WB (1:20,000) |
| Cytochrome C                    | 37BA11/ab110325 (mouse monoclonal)  | Abcam         | WB (1:10,000) |
| ATP5a                           | 15H4C4 (mouse monoclonal)           | Abcam         | WB (1:1,000)  |
| NDUFS3                          | 3F9DD2 (mouse monoclonal)           | Abcam         | WB (1:1000)   |
| UCP1                            | Ab10983 (rabbit polyclonal)         | Abcam         | WB (1:1,000)  |
| ACC                             | Ab109368 (rabbit monoclonal)        | Abcam         | WB (1:1,000)  |
| Anti-rabbit IgG                 | Anti-rabbit IgG, HRP linked (#7074) | CST           | WB (1:5,000)  |
| Anti-mouse IgG                  | Anti-mouse IgG, HRP linked (#7076)  | CST           | WB (1:5,000)  |
| Phospho-(Ser/Thr) PKA Substrate | #9621 (Rabbit polyclonal)           | CST           | WB (1:1000)   |
| PKA C-a                         | #4782 (Rabbit)                      | CST           | WB (1:1000)   |
| $\beta$ -actin                  | A5441 (mouse monoclonal)            | Sigma-Aldrich | WB (1:10,000) |
| PPAR $\alpha$                   | H98 (rabbit monoclonal)             | SCBT          | WB (1:1,000)  |
| PRDM16                          | ab118573 (rabbit polyclonal)        | Abcam         | WB (1:1,000)  |

| <b>Target antigen</b> | <b>Clone / Catalog #</b>   | <b>Manufacturer</b> | <b>Application</b> |
|-----------------------|----------------------------|---------------------|--------------------|
| FABP4                 | # 2120 (rabbit polyclonal) | CST                 | WB (1:1,000)       |
| Cre                   | #15036 (rabbit monoclonal) | CST                 | WB (1:1,000)       |
